# Supplementary material
Source: Springer Nature journal article supplement (https://www.springermedizin.de/resource/supplementary/12916_2012_692_MOESM1_ESM.pdf/9598394)
Supplement: MOESM1 [file 9598394]

## Circadian

## Non-Circadian

**Minimally  
Conscious  
State**

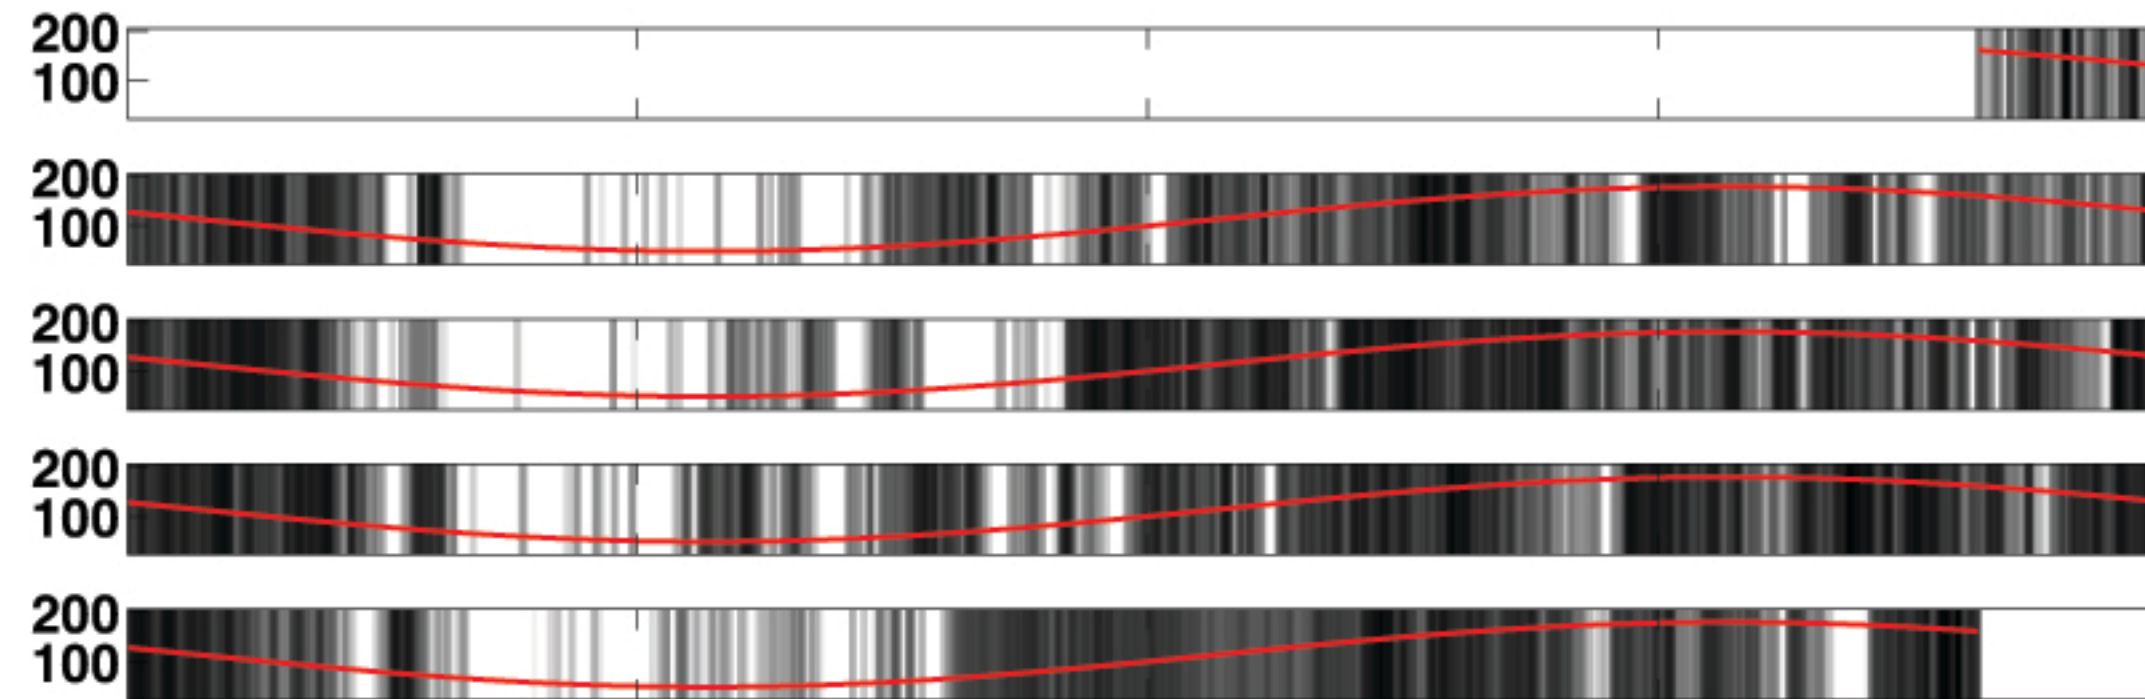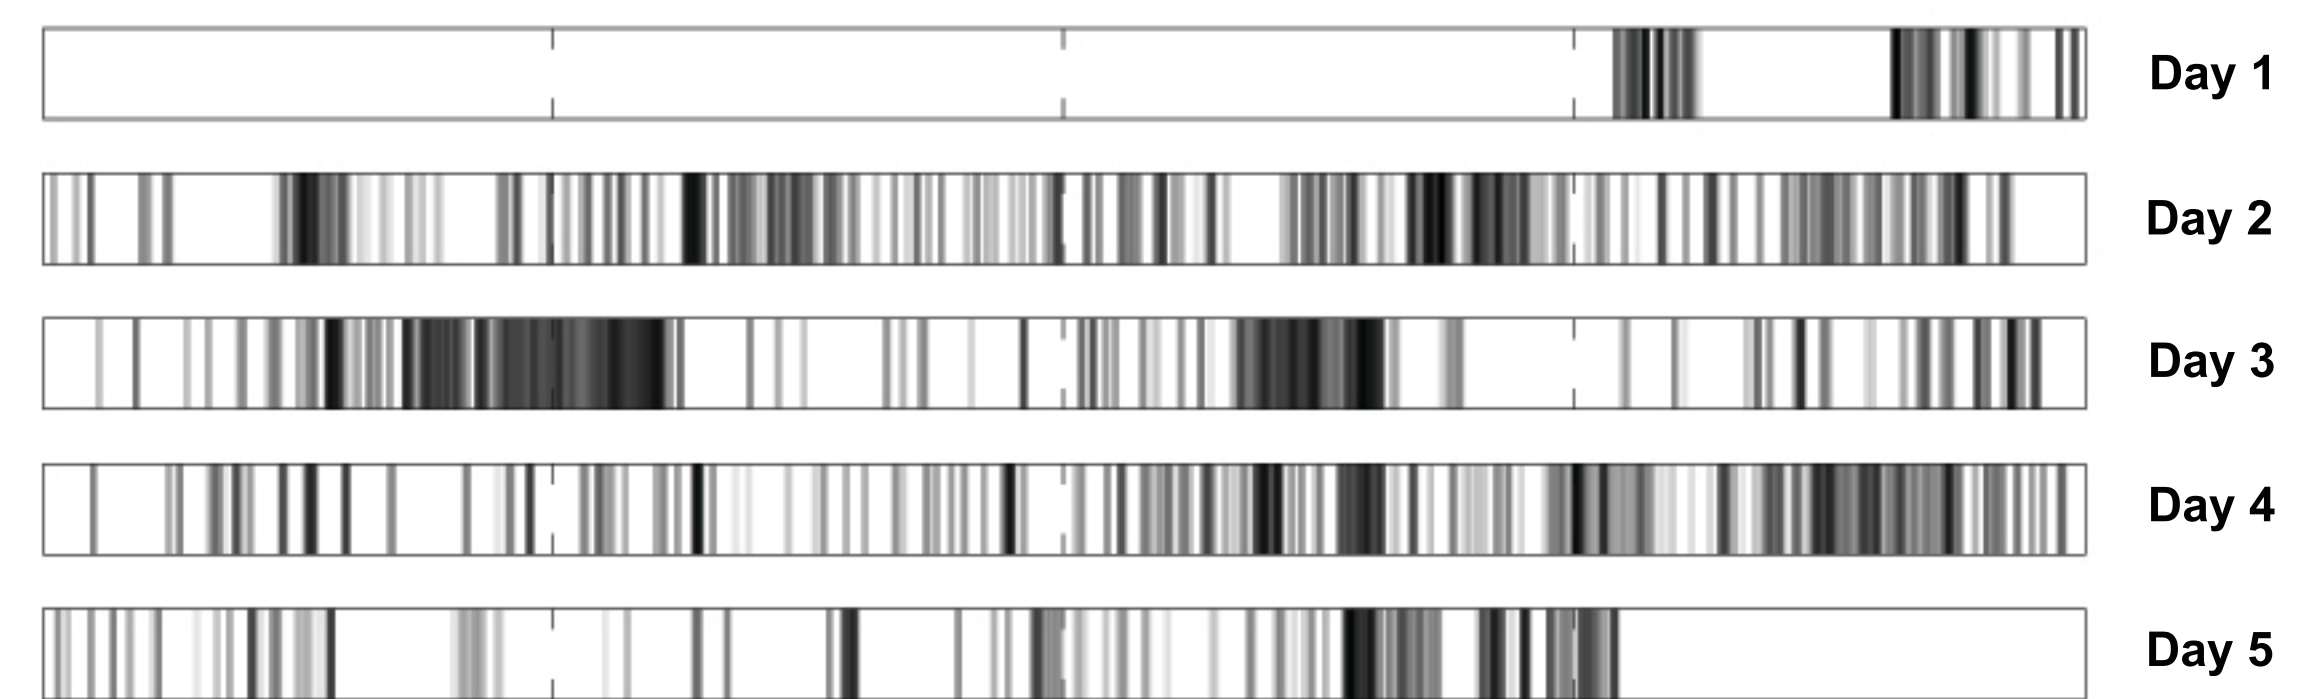

**Vegetative  
State**

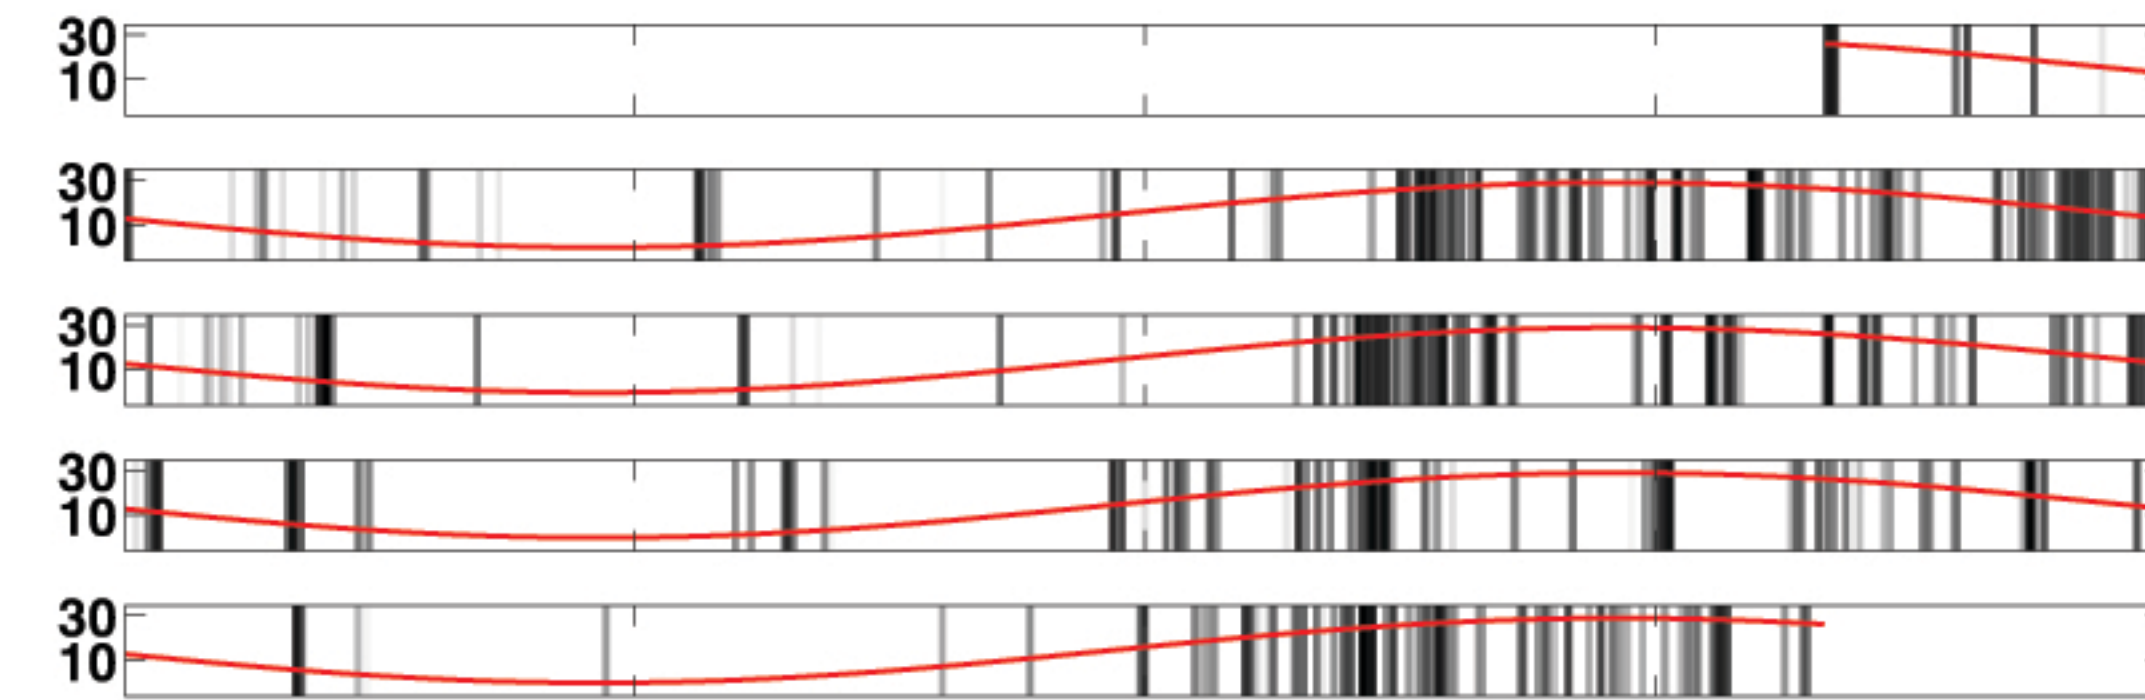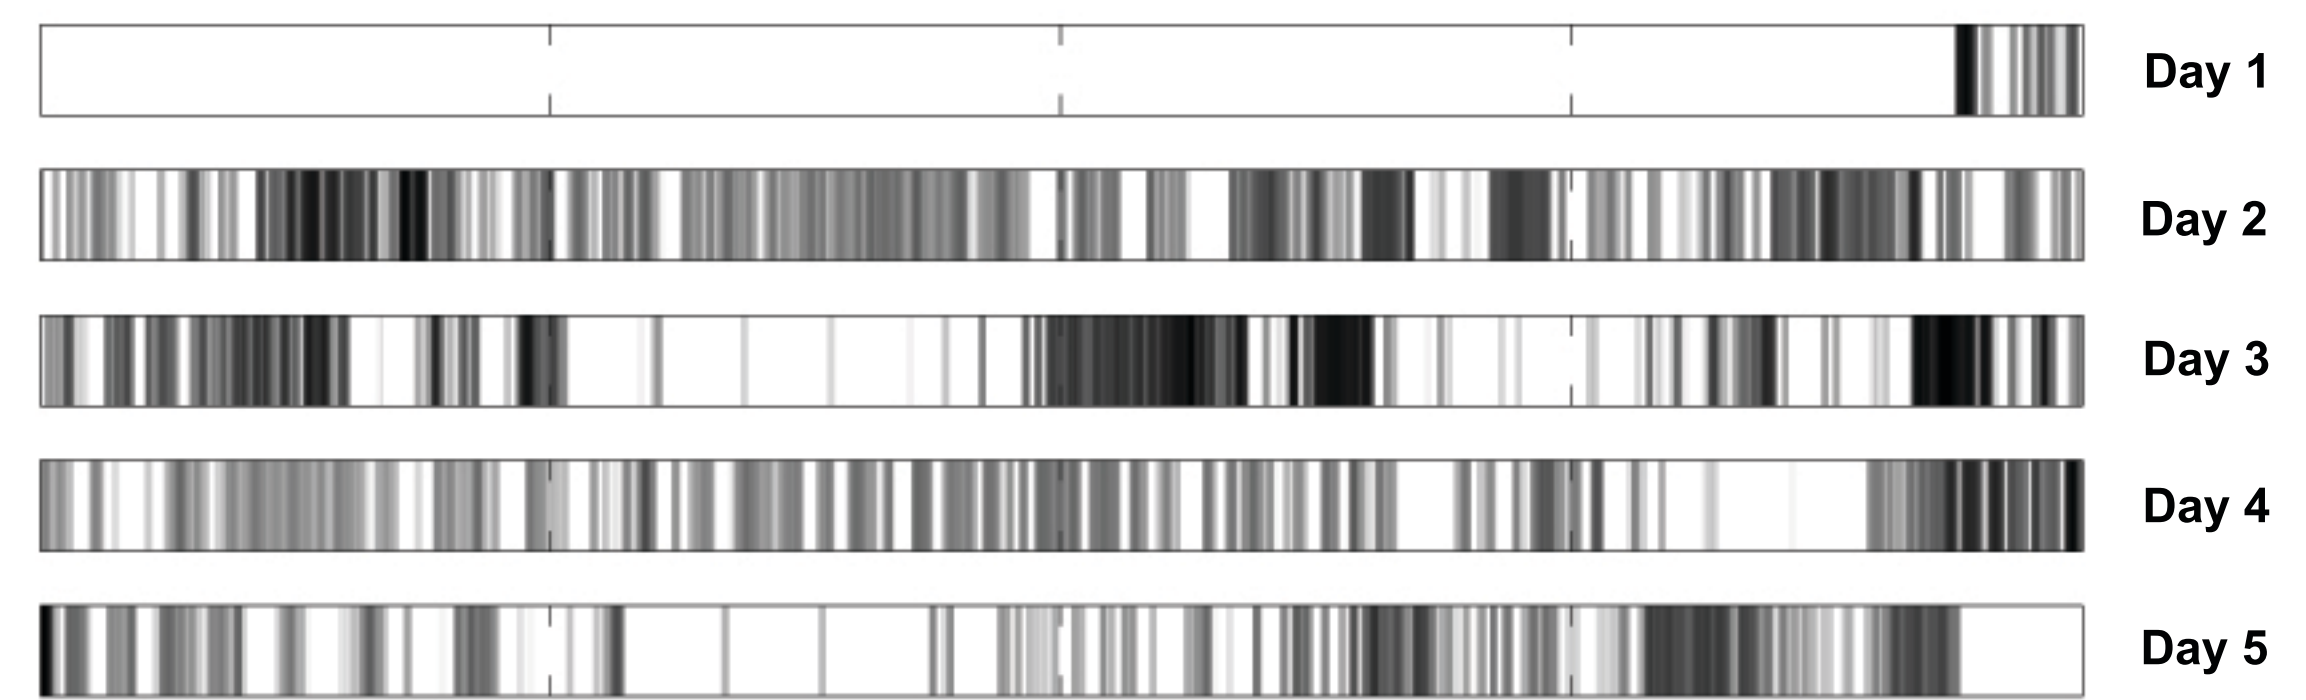

6am

12pm

6pm

6am

12pm

6pm

Day 1

Day 2

Day 3

Day 4

Day 5

Day 1

Day 2

Day 3

Day 4

Day 5
